# Supplementary material for: Chaetomium globosum from Alisma orientale (Sam.) Juzep. enhances the antioxidative stress capacity of Caenorhabditis elegans
Source: PeerJ. 2025 Aug 13;13:e19827. doi: 10.7717/peerj.19827 (PMC12357546; doi:10.7717/peerj.19827)
Supplement: Supplemental Information 1 [file peerj-13-19827-s001.xlsx]

## Sheet: Sheet1
	Effect of CGE on the viability of C. elegans
	（CGE）μg/mL	Repeat group
		1	2	3
	M9	58	60	59
	10	58	59	60
	40	58	60	59
	70	58	60	59
	100	59	60	60
	150	60	60	57
	200	58	60	59
	The data in the table is the maturity of living nematodes
	Statistical analysis of survival time of C. elegans under oxidative stress
	time（hour）	Control			RES（20μg/mL）			CGE(20μg/mL)			CGE(60μg/mL)			CGE(100μg/mL)
		1	2	3	1	2	3	1	2	3	1	2	3	1	2	3
	0	0	0	0	0	0	0	0	0	0	0	0	0	0	0	0
	0.5	1	0	0	1	0	0	0	0	0	0	0	0	0	0	0
	1	0	0	0	0	1	1	0	0	0	0	0	0	0	0	0
	1.5	7	7	7	0	2	4	4	4	2	1	2	2	2	3	0
	2	9	17	9	8	4	3	7	8	8	11	7	4	3	3	2
	2.5	13	7	13	7	12	1	12	12	16	12	12	11	14	15	9
	3	6	7	7	4	11	4	5	5	6	7	7	9	7	8	10
	3.5	2	0	3	11	5	9	5	6	3	5	6	9	5	6	9
	4	1	0	2	2	4	2	2	1	2	1	1	3	4	3	2
	4.5	0	0	0	3	0	5	1	1	0	2	1	0	1	0	5
	5	0	0	0	2	0	3	1	1	0	0	0	0	1	0	0
	5.5	0	0	0	0	0	0	1	1	2	2	0	1	1	0	4
	6	0	0	0	0	0	3	0	0	1	0	0	1	1	0	1
	total	39	38	41	38	39	35	38	39	40	41	36	40	39	38	42
	The data in the table is the maturity of death nematode
	Statistical analysis of survival time of C. elegans under oxidative stress
	time（hour）	Control			RES（20μg/mL）			CGE(20μg/mL)			CGE(60μg/mL)			CGE(100μg/mL)
		1	2	3	1	2	3	1	2	3	1	2	3	1	2	3
	0	0	0	0	0	0	0	0	0	0	0	0	0	0	0	0
	1	0	1	0	0	0	0	0	0	0	0	0	0	0	0	0
	2	1	0	0	0	0	0	1	0	0	0	0	0	1	0	0
	3	1	0	0	0	0	2	2	1	0	1	1	0	2	0	3
	4	6	3	4	2	3	4	5	3	5	2	3	5	1	1	2
	5	24	16	15	13	19	8	18	11	18	21	15	15	14	11	5
	6	0	0	0	11	13	22	7	8	7	7	11	16	15	24	17
	7	0	0	0	0	0	0	0	0	0	0	0	0	0	0	0
	total	32	20	19	26	35	36	33	23	30	31	30	36	33	36	27
	The data in the table is the maturity of death nematode
	ROS content in nematodes without stress					ROS content in nematodes without stress
	（CGE）μg/mL	Repeat group				（CGE）μg/mL	Repeat group
		1	2	3			1	2	3
	Control	10.5891	10.8004	10.6192		Control	13.8104	13.3978	13.2418
	res	9.1769	9.5438	9.543		res	11.8956	12.1791	12.2412
	20	10.0268	10.2358	10.297		20	12.8753	12.8681	12.933
	60	9.2888	9.645	9.571		60	12.2737	12.2653	12.2936
	100	10.4173	10.6024	10.5848		100	12.21	12.0176	12.1199
	Under oxidative stress conditions
	（CGE）μg/mL	MDA(nmol/mgprot)			SOD(U/mgprot)			CAT(U/mgprot)			GSH-px(U/mgprot)
	Control	1.34199	1.55309	1.40154	7.08403	6.91383	7.06844	0.779125	1.45201	1.9124	1.98179	1.48634	3.2204
	res	0.792306	0.895166	0.925123	8.59974	8.33918	8.07235	4.05834	2.37389	2.05269	7.56275	4.93223	4.93223
	20	0.980802	0.960681	0.973412	7.96298	7.88077	8.10998	2.31373	2.24245	1.78231	2.99206	2.72005	1.41443
	60	0.992116	0.949917	0.953996	7.15077	7.00289	7.21868	2.70617	2.76107	2.44268	6.22019	3.22529	4.60755
	100	1.126	1.10722	1.26123	7.21018	7.01751	6.98438	1.94814	2.05808	1.55675	5.53696	4.79869	6.27522
	Under Without oxidative stress
	（CGE）μg/mL	MDA(nmol/mgprot)			SOD(U/mgprot)			CAT(U/mgprot)			GSH-px(U/mgprot)
	Control	0.404854	0.403146	0.34592	5.66152	6.24563	6.14828	1.21262	1.03163	1.14022	2.27909	1.13954	2.46901
	res	0.252845	0.285824	0.261089	6.71164	7.08296	6.80447	1.56447	1.37514	1.74782	3.81088	3.85745	2.27727
	20	0.364918	0.305533	0.22291	6.5648	6.5539	6.67377	1.58905	1.68253	1.35	1.71518	1.68839	3.29638
	60	0.240993	0.274763	0.240993	6.10788	6.18564	6.33144	1.37209	1.86462	2.10308	3.55494	2.73462	2.13283
	100	0.239644	0.24462	0.218085	6.04155	6.11505	6.09405	0.917735	1.46469	1.58966	4.04914	1.70205	2.99284
	lipofuscin accumulation in C.elegans					lipofuscin accumulation in C.elegans
	（CGE）μg/mL	Repeat group				（CGE）μg/mL	Repeat group
		1	2	3			1	2	3
	Control	139.127	141.837	128.998		Control	698.402	659.817	724.299
	res	128.164	124.493	122.617		res	698.571	706.958	721.213
	20	121.517	119.203	123.186		20	751.096	735.588	721.339
	60	118.834	114.511	119.283		60	779.735	772.036	778.926
	100	119.491	121.776	121.201		100	746.023	769.174	736.357
	movement of C.elegans
	（CGE）μg/mL	repeat	day3			day7			day11
			A	B	C	A	B	C	A	B	C
	Control	1	10	0	0	10	0	0	9	1	0
		2	10	0	0	10	0	0	8	1	1
		3	10	0	0	10	0	0	7	3	0
	60	1	10	0	0	10	0	0	9	1	0
		2	10	0	0	10	0	0	10	0	0
		3	10	0	0	10	0	0	10	0	0
